# Supplementary material for: Increased β1-adrenergic receptor antibody confers a vulnerable substrate for atrial fibrillation via mediating Ca2+ mishandling and atrial fibrosis in active immunization rabbit models
Source: Oxford University Press journal article supplement (doi:10.1042/cs20220654), 2023-01-01
Supplement: cs-2022-0654_supp.pdf [file cs-2022-0654_supp.pdf]

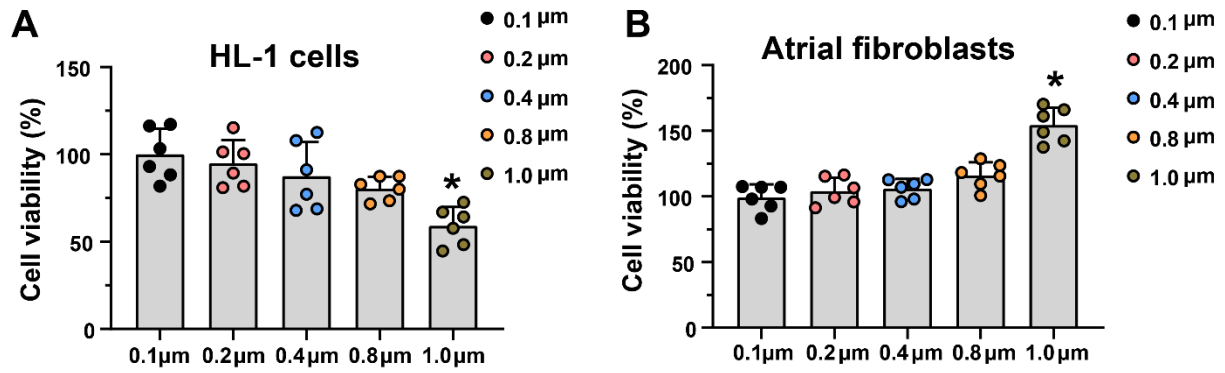

**Supplemental figure 1**

**A-B, CCK-8 assay for exogenous  $\beta 1$ -AAs intervention in HL-1 cells and atrial fibroblasts under a series of concentration gradient. \*P < 0.05 vs. minimum concentration group, and \*P < 0.05 indicates statistical significance.**

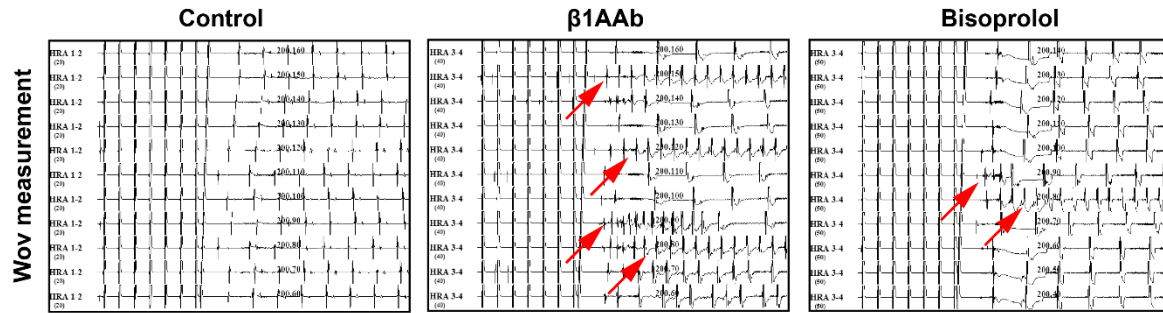

## Supplemental figure 2

Typical endocardial electrophysiological images when measuring WOV with the S1-S2 mode. Red arrows indicate the inducible atrial arrhythmias during WOV measurement process.

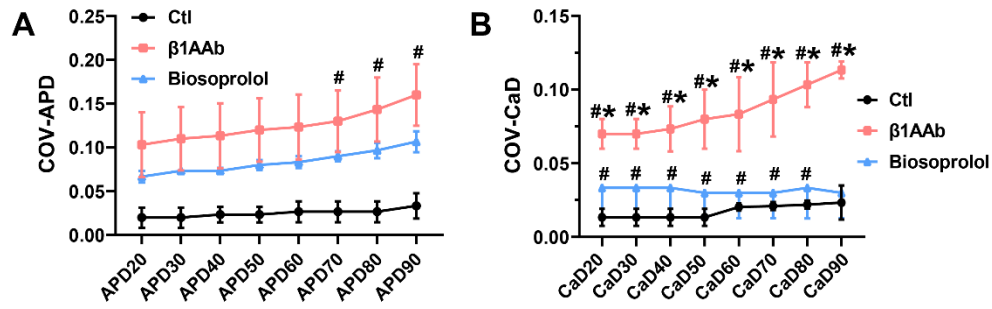

**Supplemental figure 3**

**A-B**, the coefficient of variation of APD and CaD among three groups under sinus rhythm, (n=3) per group, #P < 0.05 vs. control group; \*P < 0.05 vs. bisoprolol group.
